# Supplementary material
Source: PubMed Central journal article supplement (PMC4568502)
Supplement: supp_tpc.15.00231_TPC2015-00231-RAR1_Supplemental_Material.pdf [file supp_tpc.15.00231_TPC2015-00231-RAR1_Supplemental_Material.pdf]

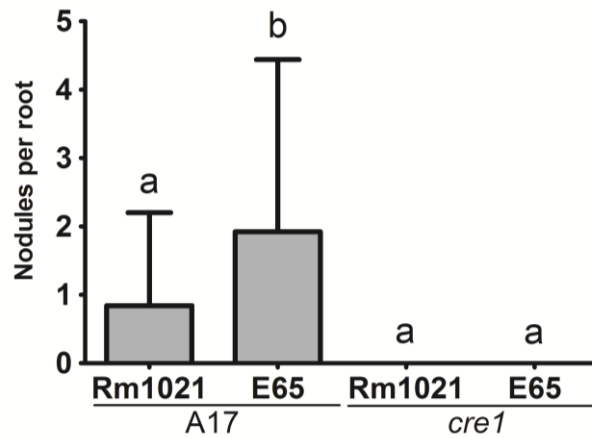

Supplemental Fig. 1. Nodulation efficiency on WT and *cre1* mutant roots spot-inoculated with *Sinorhizobium meloti* strains Rm1021 and E65. Nodules were quantified two weeks post-inoculation. A two-way ANOVA with a Tukey-Kramer multiple comparison post-test was used for statistical analysis ( $p < 0.05$ ,  $n = 20$ ). Different lowercase letters indicate significant differences in nodule numbers per plant. Graphs show mean and SD.

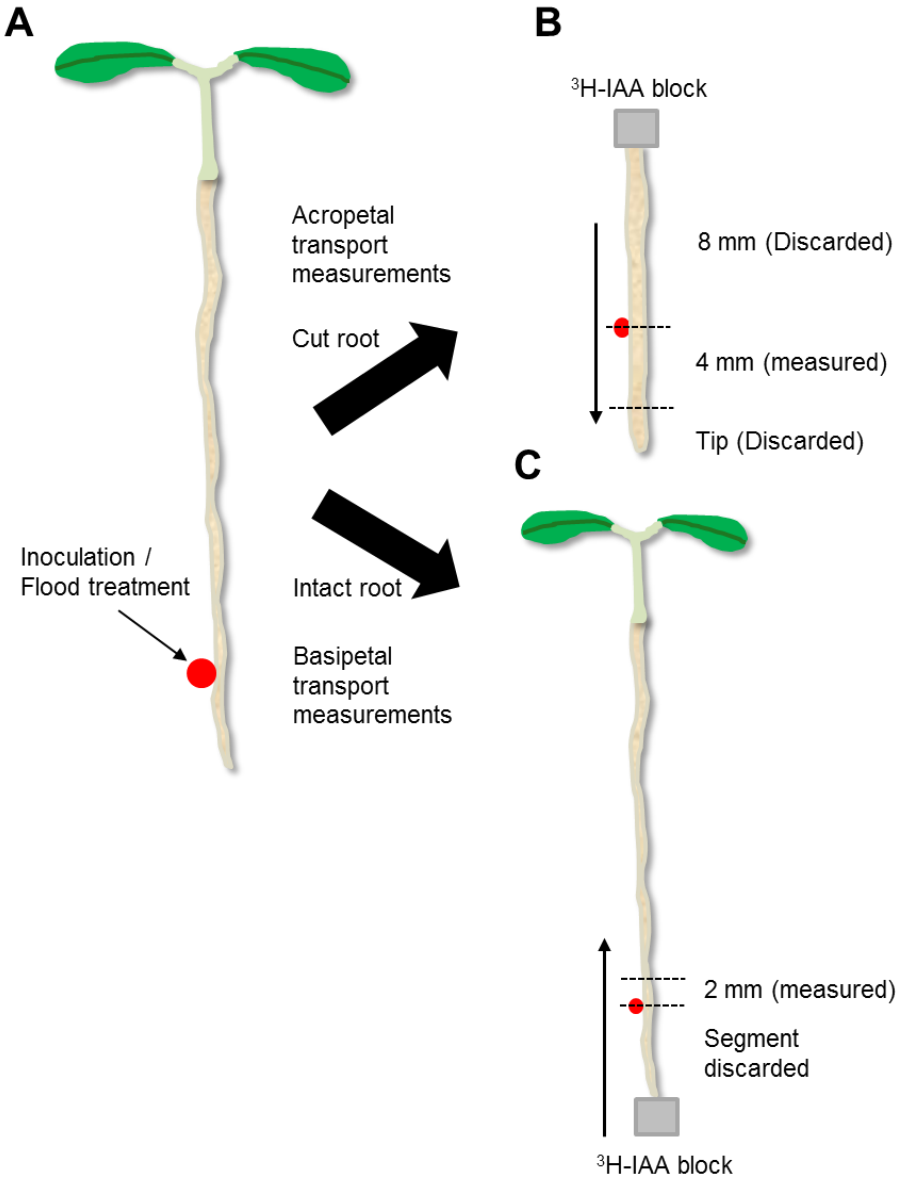

Supplemental Fig. 2. Cartoon showing auxin transport measurements performed in this study. (A) An intact seedling is treated with rhizobia and/or auxin transport inhibitors by spot inoculation or flood treatment. The inoculation site at the zone of emerging root hairs is marked on the plate for reference and roots incubated for a specified time. For acropetal transport measurements (B), the root is excised 8 mm above the inoculation spot, or an equivalent spot in a flood-treated root. The cut root is incubated with a  $^3\text{H}$ -IAA-containing agar block touching the cut end. The 8 mm segment directly touching the block is discarded and radioactivity in the segment below the inoculation spot is measured. For basipetal auxin transport measurements (C), an intact seedling is incubated with a  $^3\text{H}$ -IAA-containing agar block touching the root tip. The segment directly touching the block (~ 6 mm, depending on root growth) is discarded and radioactivity of a 2 mm segment above the inoculation spot is measured. These assays have been developed in *M. truncatula* (Wasson et al., 2006; Plet et al., 2011), based on similar protocols used in *Arabidopsis* (Lewis and Muday, 2009) and are designed to assess the capacity for polar auxin transport using radiolabelled auxin as a tracer. The amount of radiolabelled auxin that is detected in excised root segments reflects the amount of endogenous auxin (IAA) transported into that root segment. We chose to analyse root segment below and above the inoculation site, respectively, for acro- and basipetal auxin transport measurements to determine how the treatment at the local inoculation site alters the transport of auxin beyond that site. Thus, reduced acropetal auxin transport into the segment below the inoculation site indicates that less auxin is exported into that segment as a result of the local infection by rhizobia. We reported all auxin transport measurements relative to the control roots as we were interested in relative changes of auxin transport in control and treated roots. Absolute auxin transport measurements varied between experiments with every batch of radiolabelled auxin used and were therefore difficult to combine for several independent experiments. [Lewis, D.R. and Muday, G.K. (2009) Measurement of auxin transport in *Arabidopsis thaliana*. *Nature Protocols* 4: 437-451].

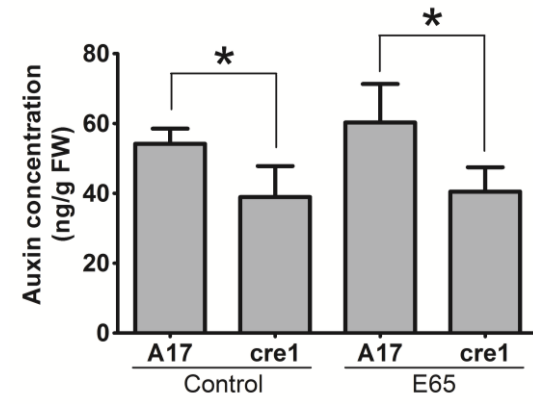

Supplemental Fig. 3. Combined auxin concentrations (sum of IAA, IBA and IAA-Ala) in WT (A17) and *cre1* mutant roots mock-treated or inoculated with E65 rhizobia. A Student's *t*-test was used for statistical analyses ( $p < 0.05$ ,  $n = 4-5$ ). Asterisks indicate significant differences in total root auxin concentrations between WT and *cre1* mutants.

**A**

***PIN1***

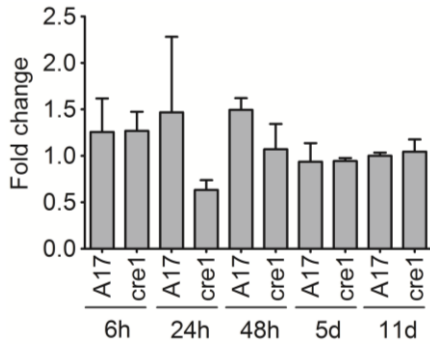

**B**

***PIN2***

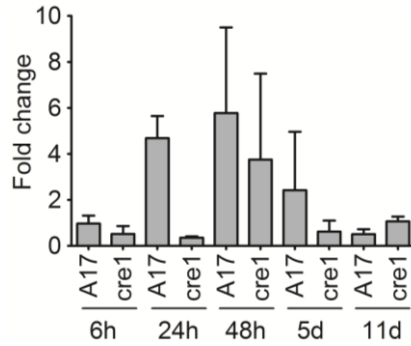

**C**

***PIN3***

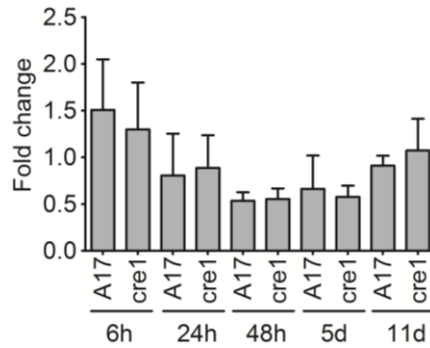

**D**

***PIN4***

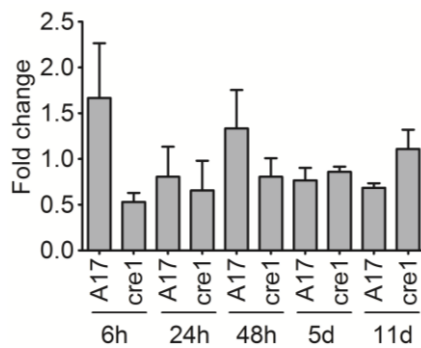

**E**

***PIN6***

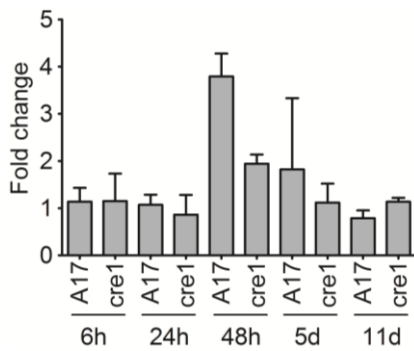

**F**

***PIN7***

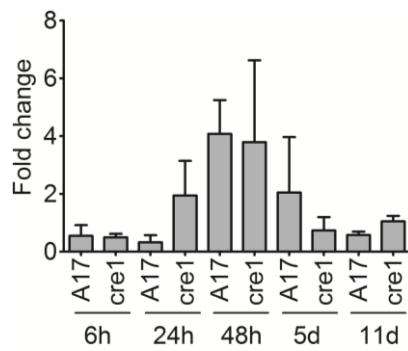

**G**

***PIN9***

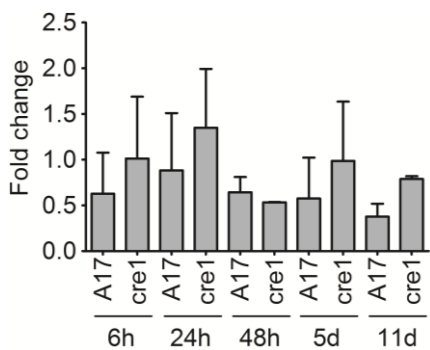

**H**

***PIN10***

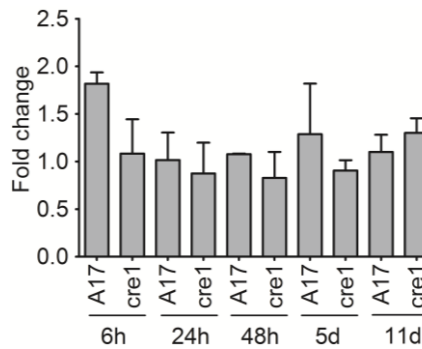

Supplemental Fig. 4. Quantitative RT-PCR of *PIN* genes. Transcript abundance was quantified in root segments inoculated for 6, 24, 48 h, 5 and 11 d with E65 relatively to mock-treated roots. Expression was normalised to the *GAPDh* reference gene. IAA exporter-encoding genes *PIN1* (A), *PIN2* (B), *PIN3* (C), *PIN4* (D), *PIN6* (E), *PIN7* (F), *PIN9* (G) and *PIN10* (H) were analysed. *PIN5* and *PIN8* mRNAs were not detected in *M. truncatula* roots (Schnabel and Frugoli, 2004). A two-way ANOVA with a Tukey-Kramer multiple comparison post-test was used for statistical analyses ( $p < 0.05$ ,  $n = 3$ ). No significant differences were found between any of the treatments. Three biological replicates consisting of at least 50 individual root segments were analysed. Graphs show mean and SD.

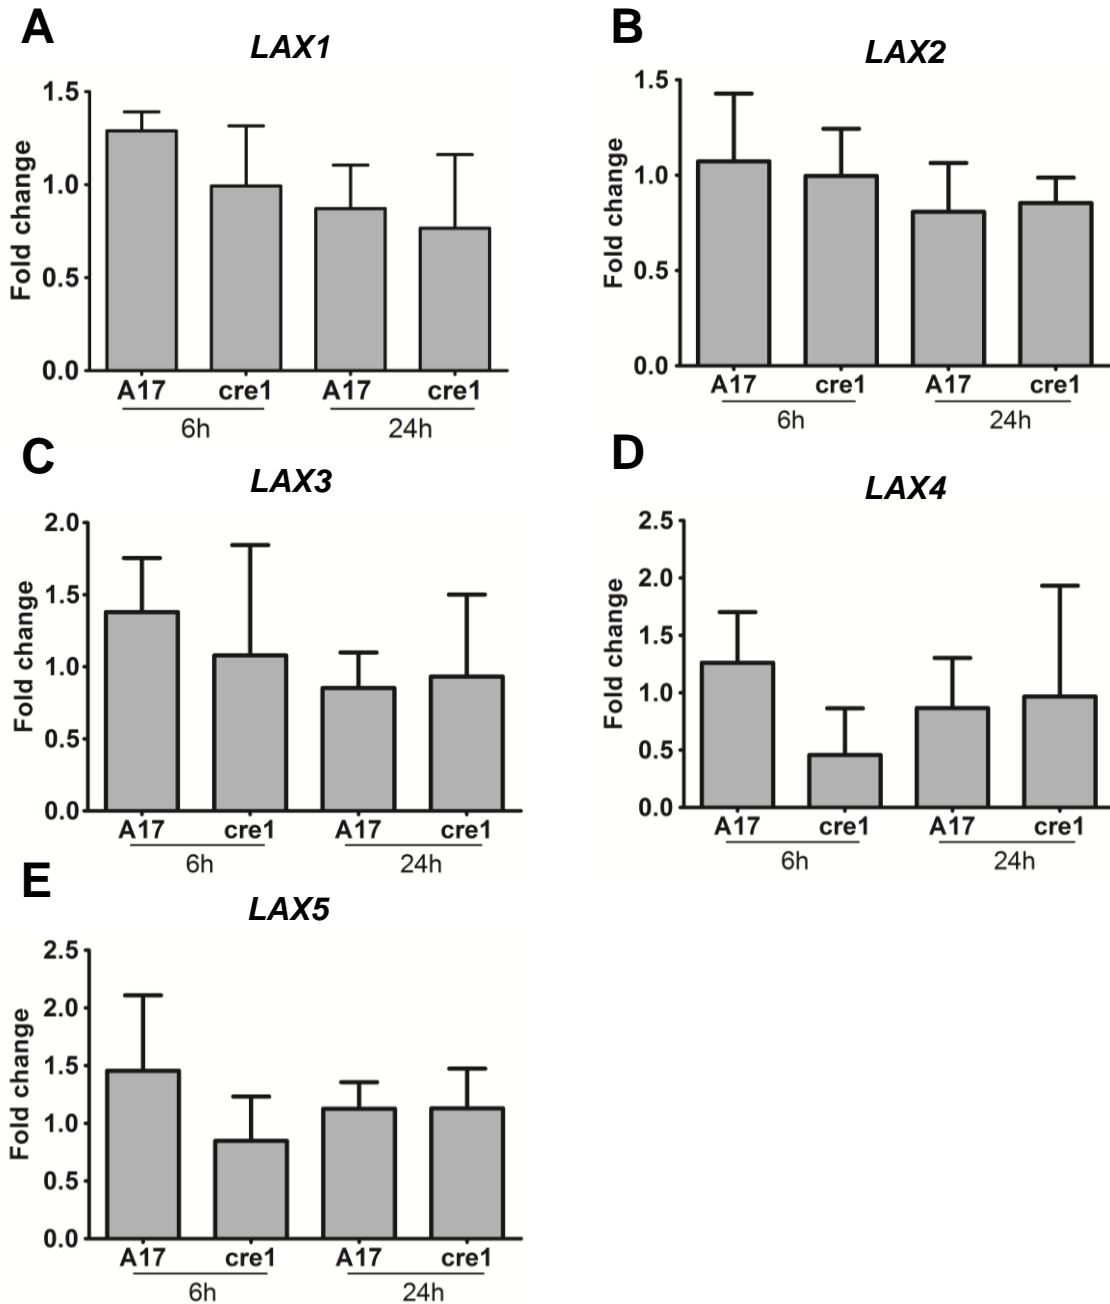

Supplemental Fig. 5. Quantitative RT-PCR of *LAX* genes. Transcript abundance was quantified in root segments inoculated for 6 and 24 h with E65 relatively to mock-treated roots. Expression was normalised to the *GAPDh* reference gene. IAA importer-encoding genes *LAX1* (A), *LAX2* (B), *LAX3* (C), *LAX4* (D), and *LAX5* (E) were analysed. A two-way ANOVA with a Tukey-Kramer multiple comparison post-test was used for statistical analyses ( $p < 0.05$ ,  $n = 3$ ). No significant differences were found between any of the treatments. Three biological replicates consisting of at least 50 individual root segments were analysed. Graphs show mean and SD.

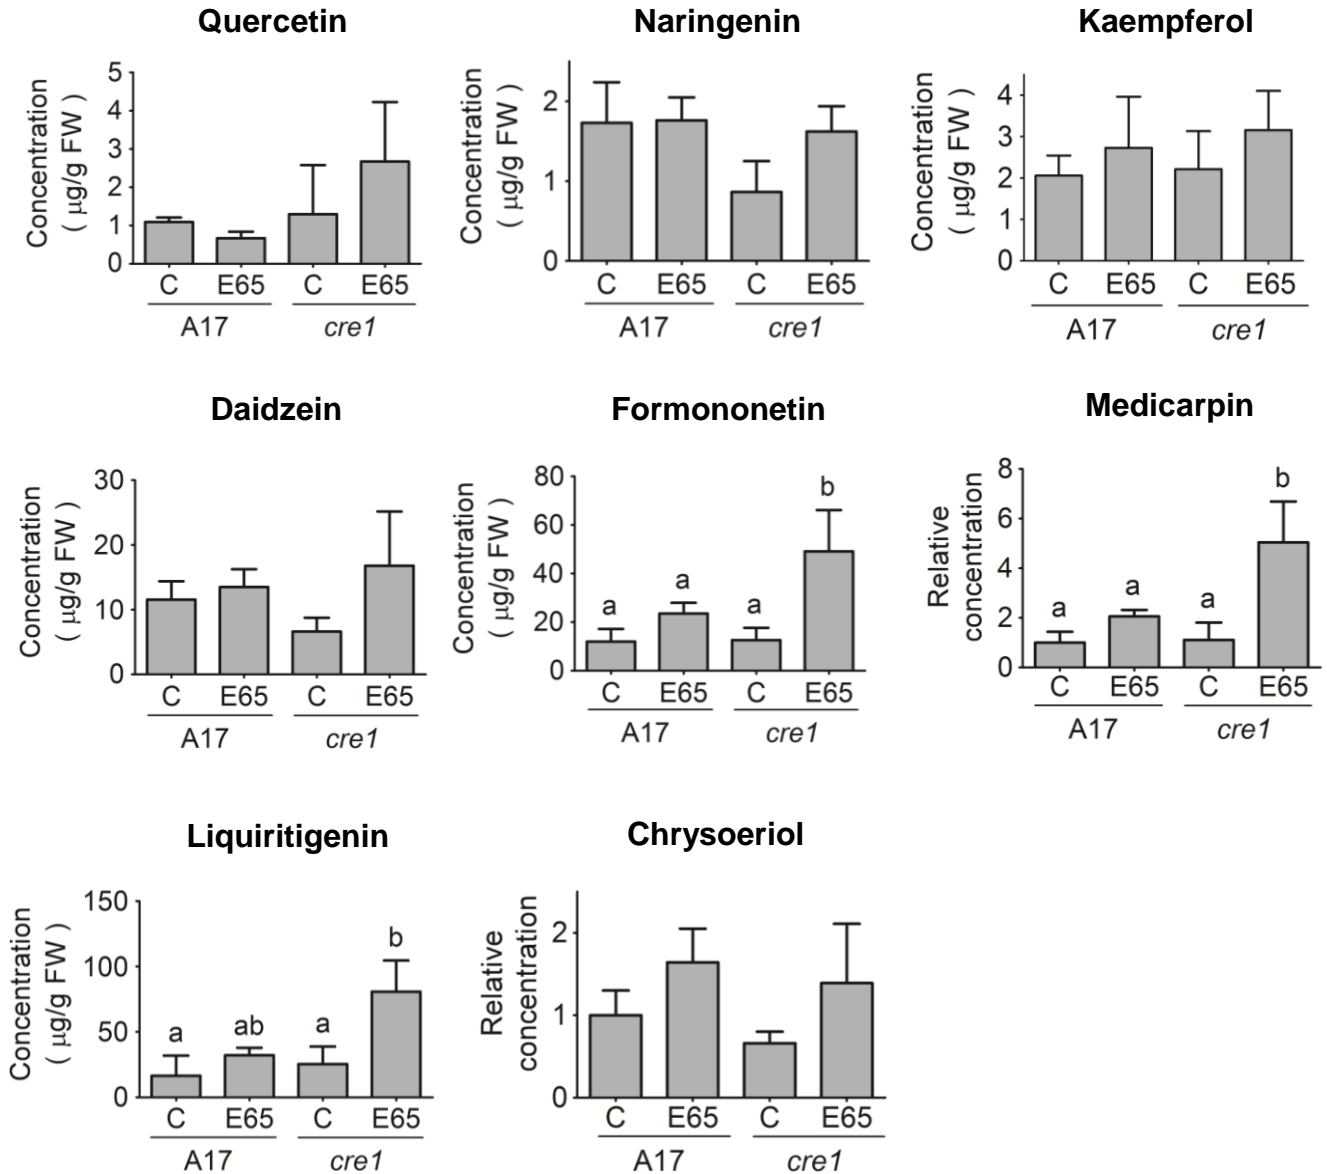

Supplemental Fig. 6. Concentrations of total flavonoid aglycones following acid hydrolysis of flavonoid glycosides in WT and *cre1* roots. The flavonoids quercetin, naringenin, kaempferol, daidzein, formononetin, medicarpin, liquiritigenin and chrysoeriol were analysed in root segments 24 h after mock- or E65 inoculation. A two-way ANOVA with a Tukey-Kramer multiple comparison post-test was used for statistical analyses ( $p < 0.05$ ,  $n = 3$ ). Different lowercase letters indicate significant changes in flavonoid concentrations measured. A total of 15 root segments were harvested for each biological replicate. Graphs show mean and SD.



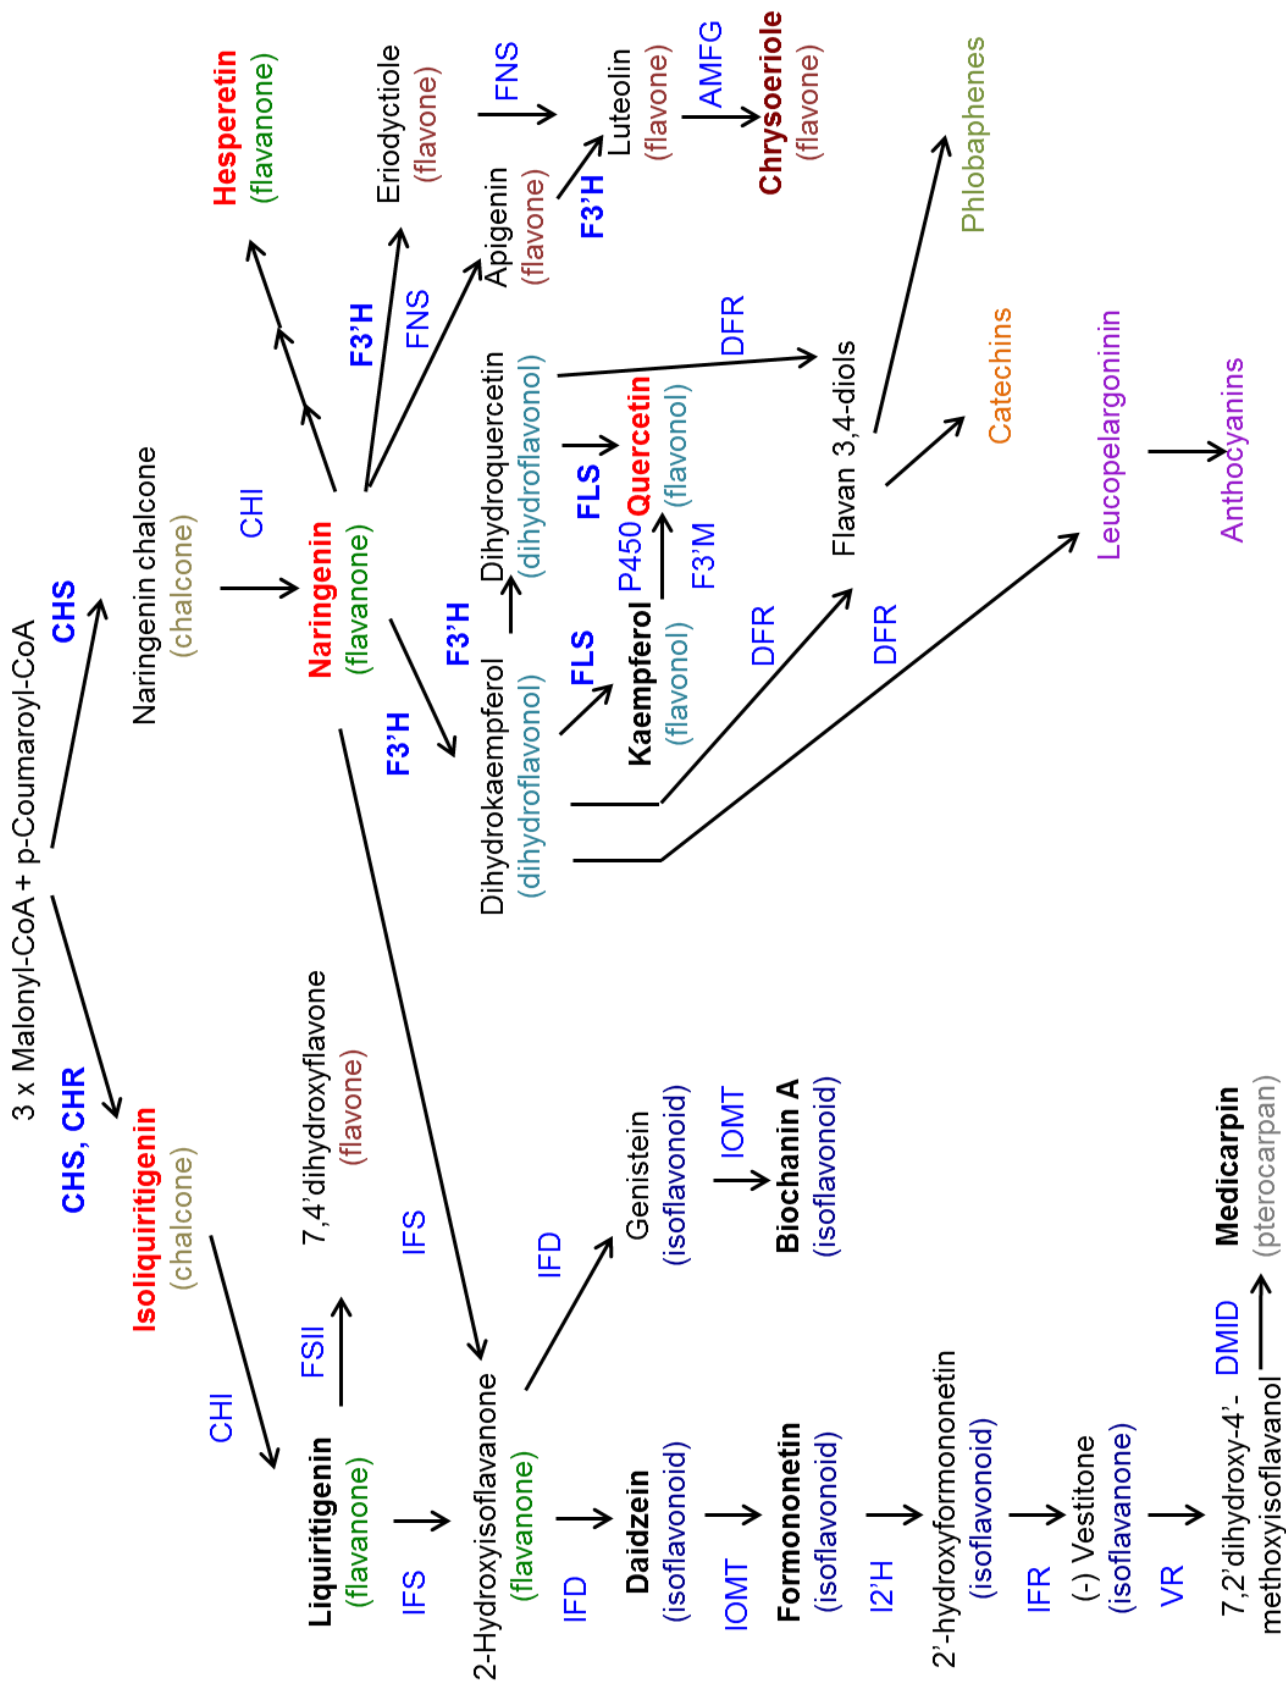

Supplemental Fig. 7. Schematic overview of the flavonoid biosynthesis pathway in *Medicago truncatula*. Aglycones that were detected in the roots are shown in bold. Flavonoids shown in bold red showed differences in induction after inoculation between genotypes (isoliquiritigenin, naringenin, hesperetin and quercetin). Different subclasses of flavonoids are indicated in different colours. Note that we could detect genistein/apigenin but could not differentiate between them because of the identical MW and elution time. Enzymes are shown in blue and are abbreviated as follows: AMFG, S-adenosylmethionine:flavonoid 7-O-glucosyltransferase; CHI, chalcone isomerase; CHR, chalcone reductase; CHS, chalcone synthase; DFR, dihydroflavonol 4-reductase; DMID, 7,2'-dihydroxy-4'-methoxy-isoflavonol dehydratase; F3'H, flavonoid-3'-hydroxylase; F3'M, flavonoid 3'-monooxygenase; FLS, flavonol synthase; FNS, flavone synthase; FSII, Flavone synthase II; I2'H, isoflavone-2'-hydroxylase; IFD, 2-hydroxyisoflavanone dehydratase; IFR, isoflavone reductase; IFS, 2-hydroxyisoflavanone synthase; IOMT, isoflavanone-O-methyltransferase; P450, cytochrome P450; VR, vestitone reductase. Genes encoding enzymes in bold were induced by E65/cytokinin treatment.

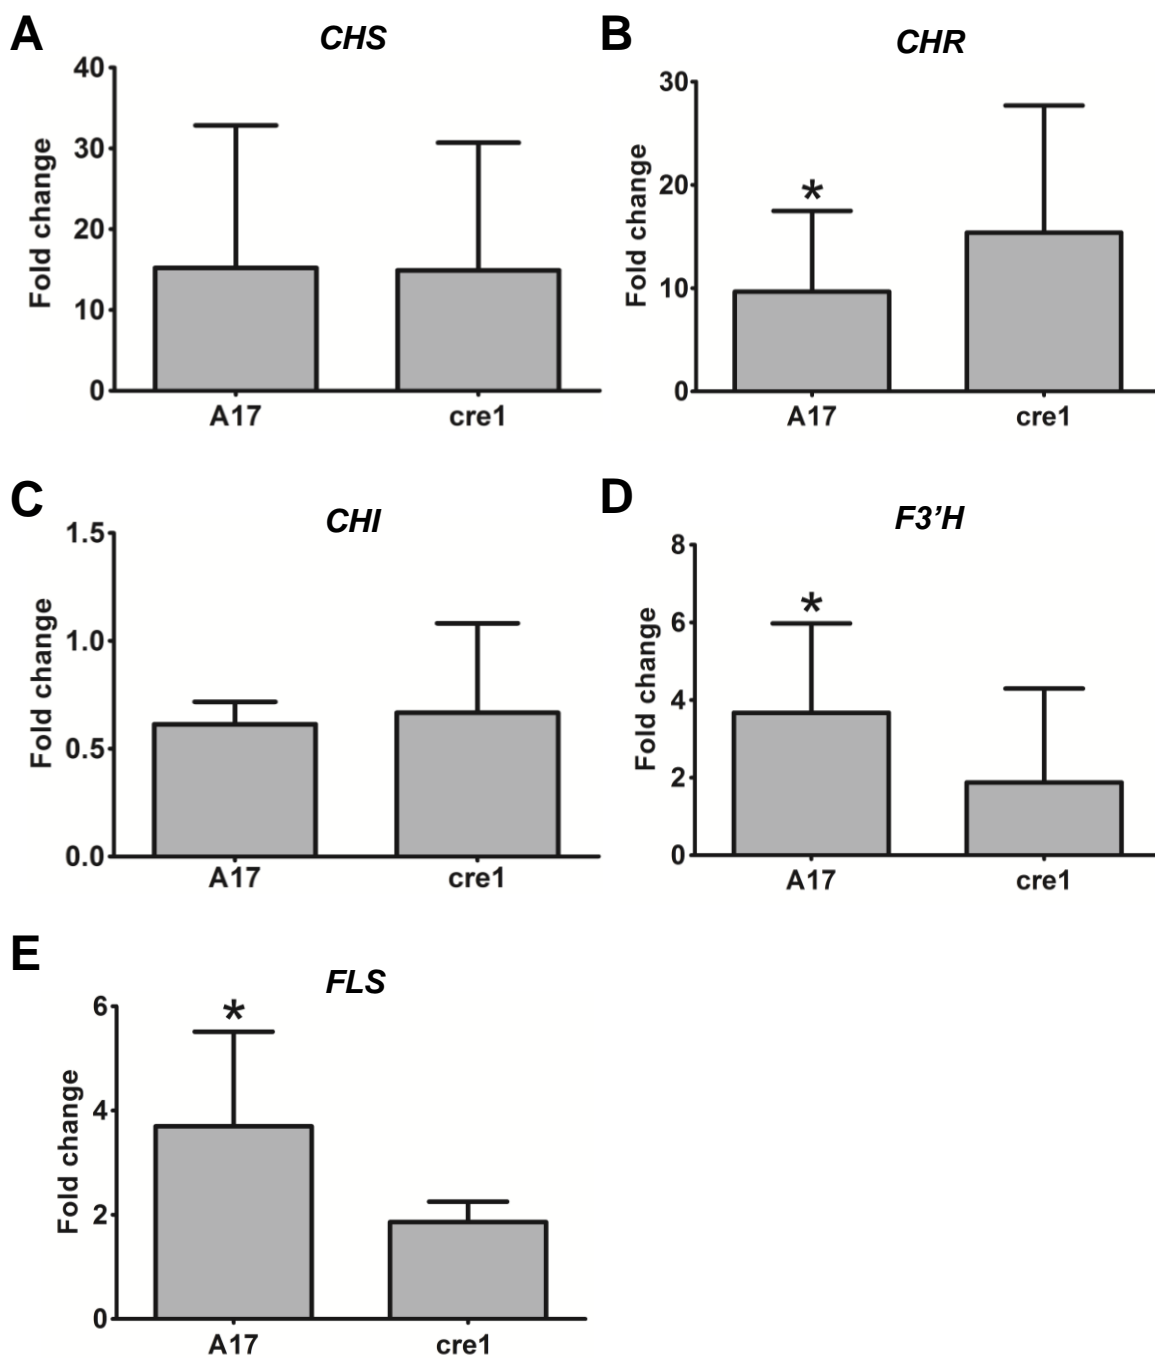

Supplemental Fig. 8. Quantitative RT-PCR showing relative transcript abundance of flavonoid-related genes in roots treated with cytokinin (Benzylaminopurine, BAP). Transcript abundance of flavonoid-related genes in WT (A17) and the *cre1* mutant roots treated with  $10^{-7}$  M BAP for 30 min, relatively to mock-treated roots. Expression was normalised to the *RIBOSOMAL BINDING PROTEIN1* (*RBP1*) reference gene (Plet et al., 2011). (A) *CHALCONE SYNTHASE* (*CHS*), (B) *CHALCONE REDUCTASE* (*CHR*), (C) *CHALCONE ISOMERASE* (*CHI*), (D) *FLAVONOID 3'-HYDROXYLASE* (*F3'H*) and (E) *FLAVONOL SYNTHASE* (*FLS*) genes were analysed. A Student's *t*-test was used for statistical analyses ( $p < 0.05$ ,  $n = 3$ ). Asterisks indicate significant inductions by BAP compared to the mock-treatment in WT. Graphs show mean and SD.

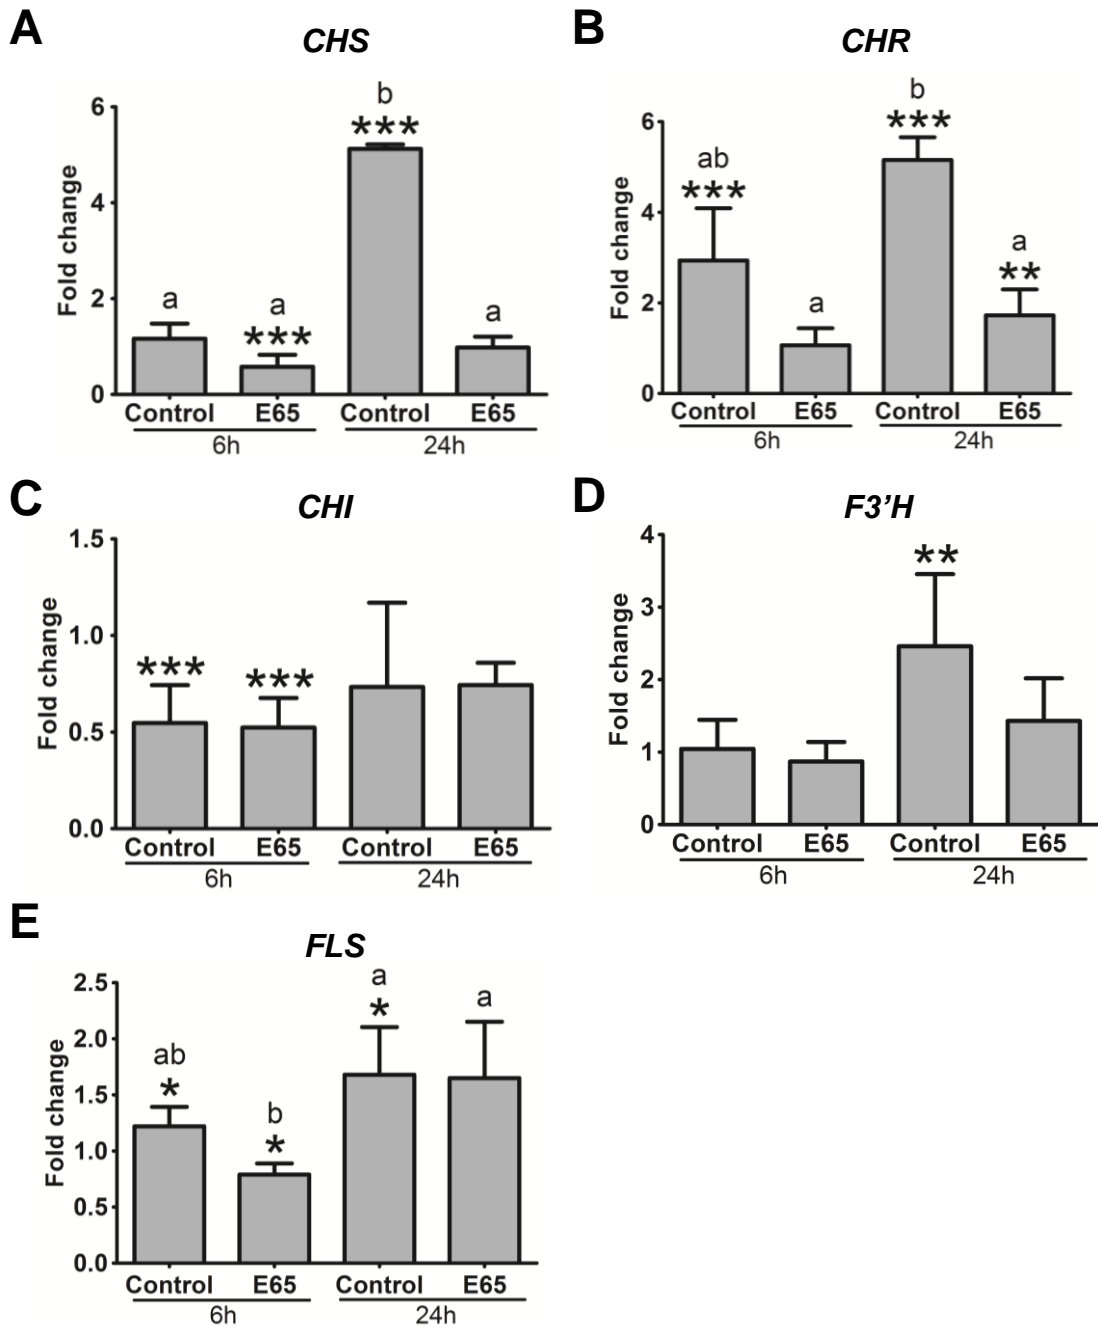

Supplemental Fig. 9. Quantitative RT-PCR showing transcript abundance of flavonoid-related genes in root segments. Transcript abundance of flavonoid-related genes in mock-inoculated (control) and inoculated (E65) roots for 6 and 24 h in *cre1* mutants relatively to WT (A17). Expression was normalised to the *GAPDH* reference gene. (A) *CHALCONE SYNTHASE* (*CHS*), (B) *CHALCONE REDUCTASE* (*CHR*), (C) *CHALCONE ISOMERASE* (*CHI*), (D) *FLAVONOID 3'-HYDROXYLASE* (*F3'H*) and (E) *FLAVONOL SYNTHASE* (*FLS*) genes were analysed. A Student's *t*-test was used for statistical analyses between *cre1* mutants and WT (fold change) ( $p < 0.05$ ,  $n = 3$ ). Asterisks indicate significant differences in induction / repression in *cre1* mutants relative to WT. A two-way ANOVA with a Tukey-Kramer multiple comparison post-test was used for statistical analyses between control and E65 treatments ( $p < 0.05$ ,  $n = 3$ ). Different lowercase letters indicate significant differences in induction / repression between control and E65 treatments. Graphs show mean and SD.

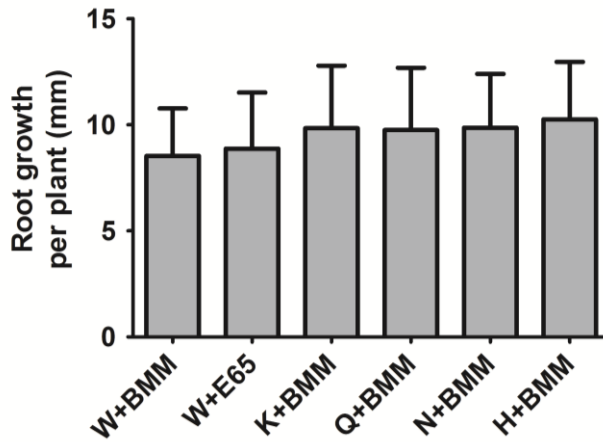

Supplemental Fig. 10. Root growth on *Medicago truncatula* WT plants with or without flavonoids and E65. A Tukey-Kramer multiple comparison test was used for statistical comparison between treatments ( $p < 0.05$ ,  $n = 15$ ). Abbreviations: W, water; K, 3  $\mu\text{M}$  kaempferol; Q, 3  $\mu\text{M}$  quercetin; N, 3  $\mu\text{M}$  naringenin; H, 3  $\mu\text{M}$  hesperetin.

**A**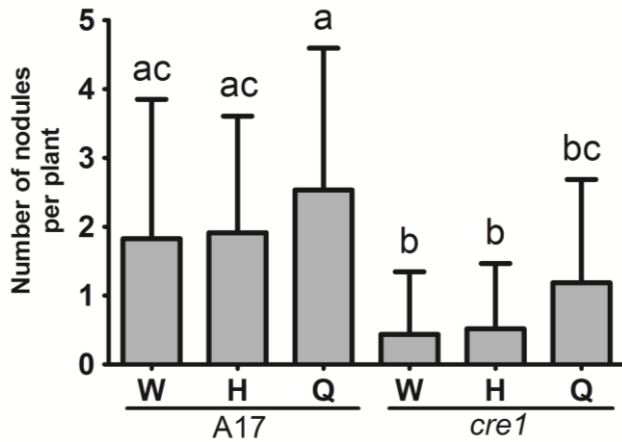**B**

| A17 |    |    | <i>cre1</i> |    |    |
|-----|----|----|-------------|----|----|
| W   | H  | Q  | W           | H  | Q  |
| 67  | 79 | 77 | 24          | 31 | 58 |

\*\*

Supplemental Fig. 11. Nodulation on WT and *cre1* mutant roots treated with or without quercetin or hesperetin, in the presence of E65. (A) Nodule formation on A17 and *cre1* mutant roots treated with or without quercetin or hesperetin, in the presence of E65. A two-way ANOVA with a Tukey-Kramer multiple comparison post-test was used for statistical comparison between treatments ( $p < 0.05$ ,  $n = 35$ ). (B) Percentage of plants forming nodules on WT (A17) and *cre1* mutant roots treated with or without quercetin or hesperetin, in the presence of E65. A two-sample Student's *t*-test was used for statistical comparison between treatments (\*\*  $p < 0.01$ ,  $n = 35$ ). Abbreviations: W, water; H, 3  $\mu$ M hesperetin; Q, 3  $\mu$ M quercetin.

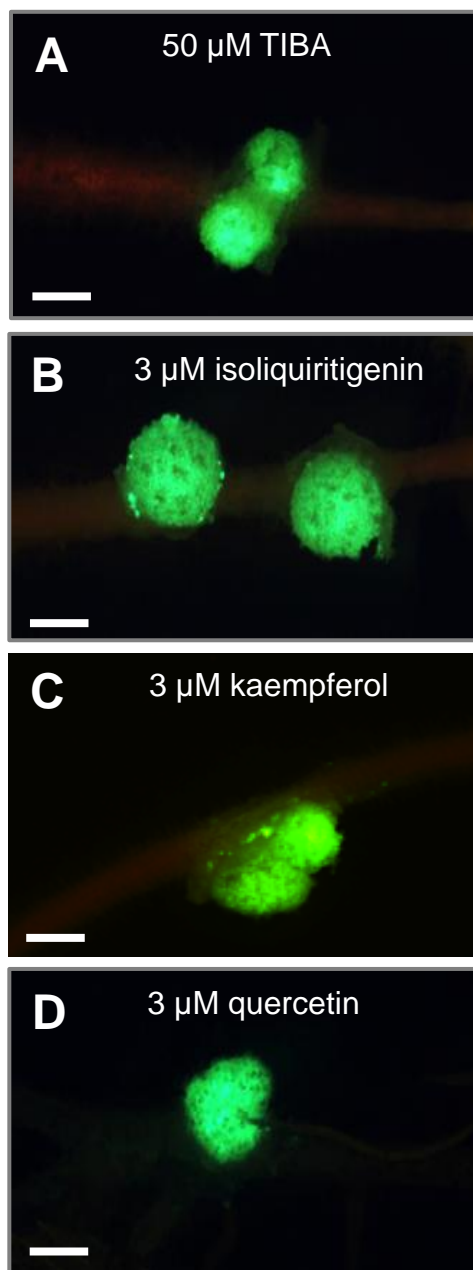

Supplemental Fig. 12. Nodules formed on *cre1* mutant roots with addition of auxin transport inhibitors are infected by rhizobia. Roots were co-flood-inoculated with each auxin transport inhibitor and a *gfp*-expressing Sm1021 E65 strain. Nodules were photographed at 3 weeks p.i.. (A) TIBA-, (B) isoliquiritigenin-, (C) kaempferol- and (D) quercetin-rescued nodules. Images were taken under GFP excitation (max. excitation 470 nm; 515 nm longpass filter). More than 20 nodule-forming roots were observed with fluorescence for each treatment. Scale bars represent 1 mm.

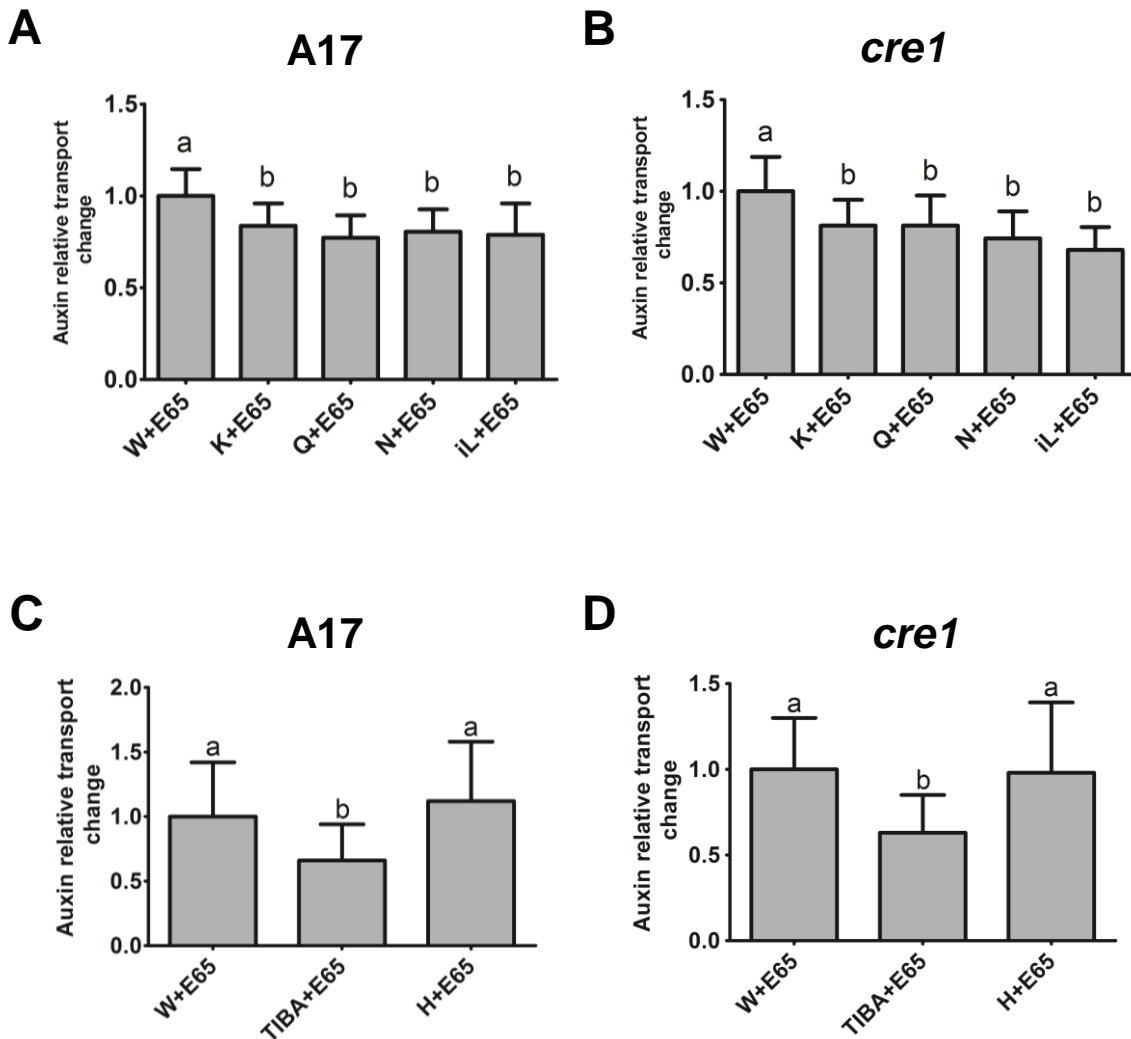

Supplemental Fig. 13. Acropetal auxin transport in roots treated with or without flavonoids, in the presence of E65. Acropetal auxin transport in E65-inoculated roots, with a short-term treatment of kaempferol, quercetin, naringenin or isoliquiritigenin on A17 (A) and *cre1* (B) plants. Acropetal auxin transport in E65-inoculated roots, with a short-term treatment of TIBA or hesperetin in A17 (C) and *cre1* (D). A Tukey-Kramer multiple comparison test was used for statistical comparison between treatments ( $p < 0.05$ ,  $n = 20$ ). Different lowercase letters indicate significant changes in relative auxin transport. Abbreviations: W, water; K, 3  $\mu\text{M}$  kaempferol; Q, 3  $\mu\text{M}$  quercetin; N, 3  $\mu\text{M}$  naringenin; iL, 3  $\mu\text{M}$  isoliquiritigenin; H, 3  $\mu\text{M}$  hesperetin. Graphs show mean and SD.



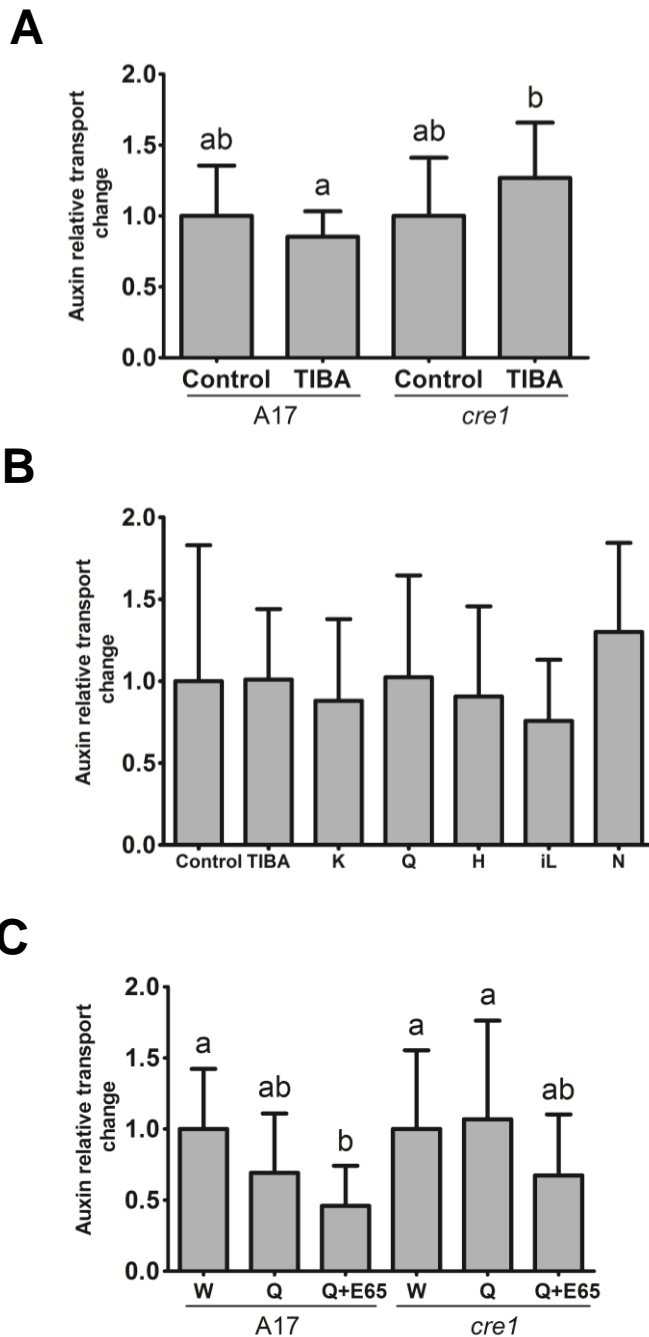

Supplemental Fig. 14. Basipetal auxin transport in WT and *cre1* mutant roots in response to auxin transport inhibitors at 24 h p.i.. (A) TIBA, (B) flavonoids (A17 only) (3  $\mu$ M) in the absence of rhizobia, (C) quercetin (3  $\mu$ M) in the absence and presence of E65. A two-way ANOVA with a Tukey-Kramer multiple comparison post-test was used for statistical analyses in (A) and (C) ( $p < 0.05$ ,  $n = 20$ ). A Tukey-Kramer multiple comparison test was used for statistical analysis in (B). Different lowercase letters indicate significant changes in relative auxin transport. Abbreviations: W, water; TIBA, 2,3,5-triiodobenzoic acid; K, 3  $\mu$ M kaempferol; Q, 3  $\mu$ M quercetin; H, 3  $\mu$ M hesperetin; iL, 3  $\mu$ M isoliquiritigenin; N, 3  $\mu$ M naringenin. Graphs show mean and SD.

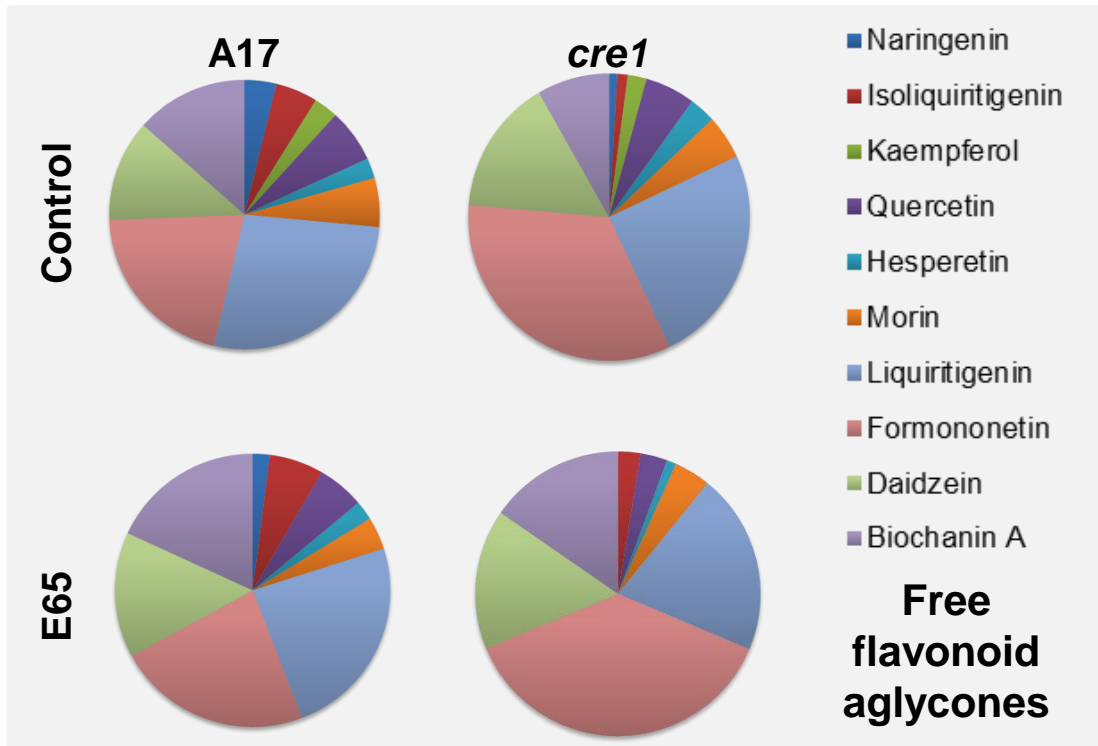

Supplemental Fig. 15. Relative flavonoid abundance (free aglycones) in WT and *cre1* mutant roots in control or E65-inoculated roots. The flavonoids shown here only represent those with absolute quantification data.

Supplemental Table 1 Quality parameters for auxin detection using LC-MS/MS in our study. Commercial auxin standards used in this study and their respective retention times, optimised collision energies, collision induced dissociation high resolution product ions, LODs<sup>a</sup>, LOQs<sup>b</sup>, linearity and correlation coefficients for identification and quantification in positive and negative ion polarity ESI targeted MS/MS.

| Analyte         | Molecular formulae                                            | MW (g/mol) | Parent Ion [M+H] <sup>+</sup> | Collision energy (eV) | t <sub>R</sub> (min) | Product ions (from most intense to least) |          |          |          |          | LOD <sup>a</sup> (pg/mg) | LOQ <sup>b</sup> (pg/mg) | Linearity (y = )  | Correlation coefficient (R <sup>2</sup> ) |
|-----------------|---------------------------------------------------------------|------------|-------------------------------|-----------------------|----------------------|-------------------------------------------|----------|----------|----------|----------|--------------------------|--------------------------|-------------------|-------------------------------------------|
|                 |                                                               |            |                               |                       |                      | 134.0892                                  | 133.0826 | 135.0961 | 116.9742 | 95.9716  |                          |                          |                   |                                           |
| <b>D5-IAA</b>   | C <sub>10</sub> H <sub>4</sub> D <sub>5</sub> NO <sub>2</sub> | 180.21     | 181.1014                      | 12                    | 12.3 ± 0.004         |                                           |          |          |          |          | 0.54                     | 0.91                     | -                 | -                                         |
| <b>IAA</b>      | C <sub>10</sub> H <sub>9</sub> NO <sub>2</sub>                | 175.19     | 176.0710                      | 10                    | 12.4 ± 0.005         | 130.0643                                  | 131.0663 | 158.0582 | 103.0522 | 77.0336  | 1.01                     | 1.69                     | 20.9120x - 0.1716 | 0.9991                                    |
| <b>IBA</b>      | C <sub>12</sub> H <sub>13</sub> NO <sub>2</sub>               | 203.24     | 204.1033                      | 12                    | 15.7 ± 0.007         | 186.0890                                  | 130.0624 | 168.0787 | 158.0934 | 144.0790 | 0.20                     | 0.51                     | 34.5990x - 0.3430 | 0.9976                                    |
| <b>IAA-Ala</b>  | C <sub>13</sub> H <sub>14</sub> N <sub>2</sub> O <sub>3</sub> | 246.27     | 247.1095                      | 10                    | 11.7 ± 0.014         | 130.0651                                  | 90.0553  | 131.0686 | 201.1019 | -        | 0.75                     | 1.26                     | 30.9550x - 0.1009 | 0.9991                                    |
| Analyte         | Molecular formulae                                            | MW (g/mol) | Parent Ion [M-H] <sup>-</sup> | Collision energy (eV) | t <sub>R</sub> (min) | Product ions (from most intense to least) |          |          |          |          | LOD <sup>a</sup> (pg/mg) | LOQ <sup>b</sup> (pg/mg) | Linearity (y = )  | Correlation coefficient (R <sup>2</sup> ) |
| <b>D5-IAA</b>   | C <sub>10</sub> H <sub>4</sub> D <sub>5</sub> NO <sub>2</sub> | 180.21     | 179.0874                      | 10                    | 12.2 ± 0.020         | 135.0960                                  | 90.9979  | 159.6305 | 59.1363  | 104.9311 |                          |                          |                   |                                           |
| <b>PAA</b>      | C <sub>8</sub> H <sub>8</sub> O <sub>2</sub>                  | 136.05     | 135.0452                      | 3                     | 11.7 ± 0.047         | 91.0526                                   | 72.0207  | 117.4564 | 50.2836  | -        | 6.90                     | 11.50                    | 1.2736x - 0.0050  | 0.9922                                    |
| <b>4-Cl-IAA</b> | C <sub>10</sub> H <sub>8</sub> ClNO <sub>2</sub>              | 209.63     | 208.0171                      | 8                     | 15.0 ± 0.006         | 164.0287                                  | 165.0275 | 128.0468 | -        | -        | 0.25                     | 0.41                     | 21.5260x + 0.1375 | 0.9956                                    |
| <b>IAA-Asp</b>  | C <sub>14</sub> H <sub>14</sub> N <sub>2</sub> O <sub>5</sub> | 290.28     | 289.0830                      | 17                    | 9.6 ± 0.059          | 88.0423                                   | 132.0311 | 115.0051 | 173.0723 | 156.0472 | 1.55                     | 2.58                     | 9.1470x + 0.0279  | 0.9975                                    |
| <b>IAA-Ile</b>  | C <sub>16</sub> H <sub>20</sub> N <sub>2</sub> O <sub>3</sub> | 288.35     | 287.1361                      | 15                    | 16.5 ± 0.002         | 130.0854                                  | 131.0887 | 156.0425 | 243.1475 | -        | 0.05                     | 0.09                     | 97.2150x + 1.1548 | 0.9959                                    |
| <b>IAA-Leu</b>  | C <sub>16</sub> H <sub>20</sub> N <sub>2</sub> O <sub>3</sub> | 288.35     | 287.1385                      | 10                    | 16.5 ± 0.002         | 130.0854                                  | 131.0887 | 156.0425 | 243.1475 | -        | 0.05                     | 0.09                     | 97.2150x + 1.1548 | 0.9959                                    |
| <b>IAA-Phe</b>  | C <sub>19</sub> H <sub>18</sub> N <sub>2</sub> O <sub>3</sub> | 322.37     | 321.1245                      | 15                    | 16.9 ± 0.007         | 164.0718                                  | 165.0749 | 147.0453 | 103.0548 | 277.1341 | 0.14                     | 0.24                     | 45.3370x + 0.3456 | 0.9974                                    |
| <b>IAA-Trp</b>  | C <sub>21</sub> H <sub>19</sub> N <sub>3</sub> O <sub>3</sub> | 361.39     | 360.1354                      | 17                    | 16.4 ± 0.003         | 203.0829                                  | 204.0864 | 74.0254  | 116.0514 | 156.0455 | 0.76                     | 1.27                     | 6.3667x + 0.1310  | 0.9914                                    |
| <b>IAA-Val</b>  | C <sub>15</sub> H <sub>18</sub> N <sub>2</sub> O <sub>3</sub> | 274.32     | 273.1243                      | 15                    | 15.1 ± 0.006         | 116.0739                                  | 117.0765 | 156.0478 | 128.0522 | 229.1371 | 0.11                     | 0.18                     | 58.1590x + 0.3346 | 0.9987                                    |

Injection precision (n=10); data shows mean and SD

<sup>a</sup> Limit of detection (LOD) ≥ 3 x S/N; <sup>b</sup> Limit of quantification (LOQ) ≥ 5 x S/N; S/N, signal-to-noise ratio

Supplemental Table 2 Induction of flavonoid-related genes by the cytokinin BAP, extracted and modified from the publication by Ariel et al. (2012).

| 16K+ microarray probe ID | Mt genome v4.0-JCVI | Fold Change_BAP vs Control | Adj. P value_BAP vs control | MTG-8 ID and annotation (TIGR database)                                                                                             | Mt genome v4.0-JCVI annotation                          | Top Uniprot hits                                                                                                                                 |
|--------------------------|---------------------|----------------------------|-----------------------------|-------------------------------------------------------------------------------------------------------------------------------------|---------------------------------------------------------|--------------------------------------------------------------------------------------------------------------------------------------------------|
| MT000038                 | Medtr4g031800       | 2.81                       | 0.00012                     | TC100176 similar to UPIQ9ZWQ6 (Q9ZWQ6) UDP-glycose:flavonoid glycosyltransferase, partial (83%)                                     | UDP-glucuronosyltransferase ZB5                         | UDP-glycose:flavonoid glycosyltransferase, Isoflavonoid glycosyltransferase, Terpenoid UDP-glucosyltransferase, Putative UDP-glycose (Fragment), |
| MT000247                 | Medtr6g042310       | 4.24                       | 0.00012                     | TC100520 weakly similar to UPIQ940V3 (Q940V3) Al2g22590/T9122_3, partial (25%)                                                      | Anthocyanidin 3-O-glucosyltransferase                   | Putative anthocyanidine rhamnosyltransferase, GT4, GT2, UDP-rhamnose:soyasaponin III-rhamnosyltransferase,                                       |
| MT001043                 | Medtr6g075830       | 2.93                       | 0.00102                     | TC94828 similar to UPIQ8L8C8 (Q8L8C8) Flavanone 3 beta-hydroxylase, complete                                                        | Flavanone 3-hydroxylase                                 | Flavanone-3-hydroxylase, Naringenin 2-oxoglutarate 3-dioxygenase                                                                                 |
| MT001070                 | Medtr6g033675       | 4.82                       | 3.00E-05                    | TC107720 similar to UPIQ9WQ4 (Q9WQ4) UDP-glycose:flavonoid glycosyltransferase (Fragment), partial (66%)                            | UDP-glucosyltransferase                                 | Flavanone-3-hydroxylase                                                                                                                          |
| MT001199                 | Medtr7g013850       | 4.32                       | 3.00E-05                    | TC107840 weakly similar to UPIQ9LRQ7 (Q9LRQ7) Anthocyanin 5-aromatic acyltransferase/benzoyltransferase-like protein, partial (21%) | Anthocyanin 5-aromatic acyltransferase                  | Anthocyanin 5-aromatic acyltransferase, Isoflavonoid malonyltransferase                                                                          |
| MT003127                 | Medtr2g083390       | 1.51                       | 0.00379                     | TC97344                                                                                                                             | UDP-glucosyltransferase family protein                  | UDP-glucosyltransferase family protein, Anthocyanidin 3-O-glycosyltransferase, Glycosyltransferase                                               |
| MT004805                 | Medtr3g092890       | 1.85                       | 0.01454                     | TC96902 similar to UPIQ9FLV0 (Q9FLV0) Flavanone 3-hydroxylase-like protein, partial (82%)                                           | UDP-glucosyltransferase family protein                  | UDP-glucosyltransferase family protein, Anthocyanidin 3-O-glycosyltransferase, Glycosyltransferase                                               |
| MT009572                 | Medtr3g092890       | 2.65                       | 0.00011                     | TC109256 similar to UPIQ7XZD0 (Q7XZD0) Isoflavonoid glycosyltransferase, partial (15%)                                              | 1-Aminocyclopropane-1-carboxylate oxidase               | 1-Aminocyclopropane-1-carboxylate oxidase, Oxidoreductase, Flavanone-3-hydroxylase                                                               |
| MT010942                 | Medtr4g102280       | 1.90                       | 0.00291                     | TC111173 weakly similar to UPIQ9ST0 (Q9ST0) Flavonoid 3',5'-hydroxylase-like protein (At4g12310), partial (9%)                      | Cytochrome P450 family protein                          | Cytochrome P450, Flavonoid 3'-hydroxylase                                                                                                        |
| MT014304                 | Medtr2g008220       | 3.47                       | 0.00012                     | TC100521 weakly similar to UPIQ940V3 (Q940V3) Al2g22590/T9122_3, partial (15%)                                                      | Anthocyanidin 3-O-glycosyltransferase                   | GT2, GT4, UDP-rhamnose:soyasaponin III-rhamnosyltransferase, Putative UDP-rhamnose:rhamnosyltransferase, UDP-glucosyltransferase,                |
| MT014596                 | N/A                 | 2.02                       | 0.00112                     | TC108655 weakly similar to UPIQ7XZD0 (Q7XZD0) Isoflavonoid glycosyltransferase, partial (47%)                                       | UDP-glucosyltransferase family protein                  | UDP-glucosyltransferase family, GT4, Glycosyltransferase                                                                                         |
| MT014666                 | Medtr5g032870       | 1.55                       | 0.0056                      | TC102386 weakly similar to UPIQ84UT8 (Q84UT8) Flavonol synthase, partial (25%)                                                      | N/A                                                     | N/A                                                                                                                                              |
| MT014842                 | Medtr6g015320       | 1.72                       | 0.00474                     | TC110716 weakly similar to UPIQ9LJB4 (Q9LJB4) Anthocyanin 5-aromatic acyltransferase-like protein, partial (17%)                    | Malonyl-CoA:isoflavone 7-O-glycoside malonyltransferase | malonyl-CoA:isoflavone 7-O-glycoside malonyltransferase, Putative anthocyanin malonyltransferase, Taxadienol acetyltransferase,                  |
| MT014912                 | Medtr2g046620       | 3.49                       | 0.00032                     | TC104594 similar to UPIQ8GVE3 (Q8GVE3) Flavonoid 1,2-rhamnosyltransferase, partial (7%)                                             | UDP-glucosyltransferase family protein                  | UDP-glucosyltransferase family, Anthocyanidin 3-O-glycosyltransferase, Glucosyltransferase,                                                      |
| MT015597                 | Medtr2g035020       | 1.65                       | 0.00017                     | TC94916 similar to UPIQ7XZD0 (Q7XZD0) Isoflavonoid glycosyltransferase, partial (71%)                                               | UDP-glucosyltransferase family protein                  | UDP-glucosyltransferase family, Cytokinin-O-glycosyltransferase, Ecdysteroid UDP-glucosyltransferase, Isoflavonoid glucosyltransferase           |
| MT015712                 | Medtr6g032950       | 2.03                       | 0.00023                     | TC109255 similar to UPIQ7XZD0 (Q7XZD0) Isoflavonoid glycosyltransferase, partial (47%)                                              | UDP-glucosyltransferase family protein                  | UDP-glucosyltransferase family, Cytokinin-O-glycosyltransferase, Ecdysteroid UDP-glucosyltransferase, Isoflavonoid glucosyltransferase           |
| MT015750                 | Medtr6g032950       | 2.66                       | 0.00034                     | TC96991 similar to UPIQ7XZD0 (Q7XZD0) Isoflavonoid glycosyltransferase, partial (51%)                                               | UDP-glucosyltransferase family protein                  | UDP-glucosyltransferase family, Cytokinin-O-glycosyltransferase, Ecdysteroid UDP-glucosyltransferase, Isoflavonoid glucosyltransferase           |
| MT015828                 | Medtr2g035040       | 1.94                       | 0.00493                     | TC94917 weakly similar to UPIQ7XZD0 (Q7XZD0) Isoflavonoid glycosyltransferase, partial (21%)                                        | Cytokinin-O-glycosyltransferase                         | GT3, Isoflavonoid glucosyltransferase, Glucosyltransferase, UDP-glycose:flavonoid glycosyltransferase                                            |

Supplemental Table 3 Summary table showing the roles of different flavonoid aglycones identified in this study.

| Flavonoid         | Differential accumulation between WT and <i>cre1</i> roots after rhizobia inoculation | Rescue of nodulation in <i>cre1</i> | Rescue of acropetal auxin transport inhibition in <i>cre1</i> | Rescue of <i>GH3:GUS</i> response in <i>cre1</i> nodule primordia | Expression of genes leading to flavonoid synthesis induced by rhizobia | Expression of genes leading to flavonoid synthesis induced by cytokinin |
|-------------------|---------------------------------------------------------------------------------------|-------------------------------------|---------------------------------------------------------------|-------------------------------------------------------------------|------------------------------------------------------------------------|-------------------------------------------------------------------------|
| Naringenin        | Yes <sup>1</sup>                                                                      | Yes                                 | Yes                                                           | Yes                                                               | Yes                                                                    | Yes                                                                     |
| Isoliquiritigenin | Yes <sup>2</sup>                                                                      | Yes                                 | Yes                                                           | Yes                                                               | Yes                                                                    | Yes                                                                     |
| Quercetin         | Yes <sup>3</sup>                                                                      | Partial                             | Yes                                                           | Yes                                                               | Yes                                                                    | Yes                                                                     |
| Kaempferol        | No                                                                                    | Yes                                 | Yes                                                           | Yes                                                               | Yes                                                                    | Yes                                                                     |
| Hesperetin        | Yes <sup>3</sup>                                                                      | No                                  | No                                                            | No                                                                | Yes                                                                    | Yes                                                                     |
| Chrysoeriol       | No                                                                                    | Not tested                          | Not tested                                                    | Not tested                                                        | No                                                                     | Yes                                                                     |
| Morin             | No                                                                                    | Not tested                          | Not tested                                                    | Not tested                                                        | Not tested                                                             | Not tested                                                              |
| Liquiritigenin    | No                                                                                    | Not tested                          | Not tested                                                    | Not tested                                                        | Not tested                                                             | Not tested                                                              |
| Daidzein          | No                                                                                    | Not tested                          | Not tested                                                    | Not tested                                                        | Not tested                                                             | Not tested                                                              |
| Formononetin      | No                                                                                    | Not tested                          | Not tested                                                    | Not tested                                                        | Not tested                                                             | Not tested                                                              |
| Medicarpin        | No                                                                                    | Not tested                          | Not tested                                                    | Not tested                                                        | Not tested                                                             | Not tested                                                              |
| Biochanin A       | No                                                                                    | Not tested                          | Not tested                                                    | Not tested                                                        | Not tested                                                             | Not tested                                                              |

<sup>1</sup> Differential accumulation between E65-inoculated WT and *cre1* mutant roots, but no significant induction in WT inoculated vs WT control roots

<sup>2</sup> Differential accumulation in response to E65 inoculation, as well as between inoculated WT and *cre1* mutant roots

<sup>3</sup> Differential accumulation in response to E65 inoculation only in WT but not in *cre1* mutant roots

Supplemental Table 4 Primer sequences of genes used in this study and their gene IDs (v4.0). *PIN5* and *PIN8* mRNAs were not detected in *M. truncatula* roots (Schnabel and Frugoli, 2004).

| Gene         | Gene ID (Medicago v4.0) | Sequences of primer pairs                                       |
|--------------|-------------------------|-----------------------------------------------------------------|
| <i>PIN1</i>  | Medtr4g084870           | 5'-TGCCCTGAACAAGCTAGGAG-3' ; 5'-GAGACGGGTATAAACACTTGC-3'        |
| <i>PIN2</i>  | Medtr4g127100           | 5'-AGCCTAAGCTGATTGCATGTGG' ; 5'-TGCTATTGAGGTTGCCGCAATC-3'       |
| <i>PIN3</i>  | Medtr1g030890           | 5'-CTTCGCCGGTTCGAAAG-3' ; 5'-GTTTCATCAGCCACCACCACATC-3'         |
| <i>PIN4</i>  | Medtr6g069510           | 5'-GCATGGCTATGTTTCAGTCTTGG-3' ; 5'-GACCAACAAGGAATCTCACACC-3'    |
| <i>PIN6</i>  | Medtr1g029190           | 5'-CAGCCTCGTATCATTGCTTGTG-3' ; 5'-CGGCAATCGAGGATAAGGAC-3'       |
| <i>PIN7</i>  | Medtr4g127090           | 5'-TGTGATTGCGGCAACCTC-3' ; 5'-TGGCAACACAAAAGGGAACG-3'           |
| <i>PIN9</i>  | Medtr7g079720           | 5'-ATGGGTGGATCTTGTG-3' ; 5'-CCCTCTATCCCGTTCTTC-3'               |
| <i>PIN10</i> | Medtr7g089360           | 5'-TGCCACCTGTAGTATTATG-3' ; 5'-GGGACCAGGTAAGACCAATAAG-3'        |
| <i>LAX1</i>  | Medtr5g082220           | 5'-CTTGGCCTGGCATGACTAC-3' ; 5'-TCTTTGGACCCGAGTGAACC-3'          |
| <i>LAX2</i>  | Medtr4g415390           | 5'-TGGGTTTGGGTTTGGAGGATGG-3' ; 5'-GACTGGTGGTGGTTTGCATTGG-3'     |
| <i>LAX3</i>  | Medtr3g072870           | 5'-GACAGGCTGAGGATGTGAAG-3' ; 5'-AACAGCATGTCCACCAAAAGG-3'        |
| <i>LAX4</i>  | Medtr4g415390           | 5'-TGGAGGATGGGCTAGTATGACC-3' ; 5'-ATGGTCTTGAGGTGGTGTGG-3'       |
| <i>LAX5</i>  | Medtr4g073770           | 5'-CCACCGTTGGATCTACTTG-3' ; 5'-CATTCTGTCGAGCAGAGGGATG-3'        |
| <i>GH3</i>   | Medtr5g016320           | 5'-CTCAGAGTTTCTGACCAGTTCAG-3' ; 5'-AGTAGGCTGTACAATAACTGACGAC-3' |
| <i>CHS</i>   | Medtr7g016780           | 5'-CACCTTCGTGAAGCTGGACT-3' ; 5'-GTGGCTCAAAAGCGTCAACC-3'         |
| <i>CHR</i>   | Medtr5g097900           | 5'-TTGGCCACTTAGCTCTCAGC-3' ; 5'-CCATGGATTCCCAACACCCC-3'         |
| <i>CHI</i>   | Medtr1g115870           | 5'-CCACGAGCTCCTATCCT-3' ; 5'-ACTGCTGTCTCAACCTCTGG-3'            |
| <i>F3H</i>   | Medtr3g025230           | 5'-CACCTTATGGTCCGGGTG-3' ; 5'-TACCTCTTCTGACGCAAGT-3'            |
| <i>FLS</i>   | Medtr5g032870           | 5'-GTGACCAACAATGTGCAACC-3' ; 5'-TTGGAGGGTGTCTTTCATC-3'          |
| <i>FLS</i>   | Medtr4g100590           | 5'-GGTGCCTCTGCTCATTGATTCAG-3' ; 5'-CCACACCTGAGGTTGCTTCA-3'      |
| <i>GAPdh</i> | Medtr3g085850           | 5'-TGCCTACCCTGATGTTTTCAGT-3' ; 5'-TTGCCCTCTGATTCCTCCTTG-3'      |
| <i>RBP1</i>  | Medtr6g034835           | 5'-AGGGCAAGTTCTTCATTT-3' ; 5'-GGTAGAAGTCTGGCTCAGG-3'            |
